# Supplementary material
Source: MDPI journal article supplement (https://www.mdpi.com/1424-2818/15/6/709)
Supplement: s1 [file s1]

## Supplementary Materials

### Stable isotopes and herding strategies in Middle Uruk Period in Tell Humeida (Syrian Euphrates valley)

Grandal-d'Anglade, A., García-Vázquez, A., Moreno García, M., Peña-Chocarro, L., Sanjurjo-Sánchez, J., Montero-Fenollós, J.L.

**Table S-1.** Tell Humeida plant macroremains

| Cultivated species                               | number of remains |
|--------------------------------------------------|-------------------|
| <i>Hordeum vulgare</i> (rachis)                  | 7                 |
| <i>Hordeum vulgare</i>                           | 14                |
| <i>Triticum monococcum/dicoccum</i> (gluma base) | 10                |
| <i>Triticum</i> cf. <i>monococcum</i>            | 2                 |
| <i>Triticum monococcum</i>                       | 2                 |
| <i>Triticum dicoccum</i>                         | 1                 |
| <i>Triticum dicoccum</i> (spikelets)             | 5                 |
| <i>Triticum dicoccum</i> (glume base)            | 16                |
| Cereal (fragments)                               | 10                |
| Cereal indet                                     | 2                 |
| Wild species                                     | number of remains |
| <i>Carex</i> sp.                                 | 10                |
| <i>Chenopodium</i> sp.                           | 3                 |
| <i>Cyperus</i> sp.                               | 3                 |
| <i>Galium</i> sp.                                | 1                 |
| <i>Heliotropium</i> sp.                          | 2                 |
| <i>Lolium</i> sp.                                | 4                 |
| <i>Medicago/Melilotus</i> sp.                    | 15                |
| Poaceae, <i>Cynodon</i> type                     | 1                 |
| <i>Rumex</i> sp.                                 | 10                |
| <i>Salvia</i> sp.                                | 4                 |
| <i>Silene</i> sp.                                | 1                 |
| <i>Trigonella</i> sp.                            | 7                 |
| <i>Aculeus</i>                                   | 1                 |

**Table S-2.** Tell Humeida faunal remains

Bone abbreviations: SKL: skull; D = deciduous; MAN: mandible; HYD: hyoid; ATL: atlas; AXS: axis; VX: vertebra; SAC: sacrum; SC: scapula; HU: humerus; RA: radius; UL: ulna; CAR: carpal; MTC: metacarpal; PEL: pelvis; FE: femur; PAT: patella; TI: tibia; FI: fibula; AST: astragalus; CAL: calcaneus; TAR: tarsal; MTT: metatarsal; PH1: 1st phalanx; PH2: 2nd phalanx; PH3: 3rd phalanx; SES: sesamoid; LBF= long bone fragment. Fgt.: fragment.

Taxa abbreviations: EQU: equid; BOS: cattle; OVA: sheep; OC: sheep/goat; OCG: sheep/goat/gazelle; GAZ: gazelle; CER: Cervidae; CAN: canid; FEL: felid; MSM: medium-sized mammal; LSM: large-sized mammal.

|                     | EQU        | BOS        | OVA        | OC         | OCG        | GAZ        | CER        | CAN        | FEL        | MSM         | LSM        | unidentified |
|---------------------|------------|------------|------------|------------|------------|------------|------------|------------|------------|-------------|------------|--------------|
| <b>Skull</b>        |            |            |            |            |            |            |            |            |            |             |            |              |
| SKL                 | -          | -          | 1          | -          | -          | -          | -          | -          | -          | -           | -          | -            |
| D upper teeth       | -          | -          | -          | -          | -          | -          | -          | -          | -          | -           | -          | -            |
| Upper teeth         | 1          | -          | -          | 3          | -          | -          | -          | -          | -          | -           | -          | -            |
| MAN                 | -          | -          | 1          | 1          | -          | 2          | 1          | 1          | -          | 16          | -          | -            |
| D lower teeth       | -          | -          | 1          | 3          | -          | 1          | -          | -          | -          | -           | -          | -            |
| Lower teeth         | 3          | -          | 1          | -          | 2          | -          | -          | -          | -          | -           | -          | -            |
| Tooth frag.         | -          | -          | -          | -          | -          | -          | -          | -          | -          | 1           | -          | -            |
| HYD                 | -          | -          | -          | -          | -          | -          | -          | -          | -          | -           | -          | -            |
| <b>Axial</b>        |            |            |            |            |            |            |            |            |            |             |            |              |
| ATL                 | -          | -          | -          | -          | -          | -          | -          | -          | -          | -           | -          | -            |
| AXS                 | -          | -          | -          | -          | -          | -          | -          | -          | -          | -           | -          | -            |
| VX                  | -          | -          | -          | -          | -          | -          | -          | -          | -          | 3           | -          | -            |
| SAC                 | -          | -          | -          | -          | -          | -          | -          | -          | -          | -           | -          | -            |
| RIB                 | -          | -          | -          | -          | -          | -          | -          | -          | -          | 16          | 1          | -            |
| <b>Front limb</b>   |            |            |            |            |            |            |            |            |            |             |            |              |
| SC                  | 1          | -          | -          | -          | -          | -          | -          | -          | -          | 3           | 1          | -            |
| HU                  | -          | -          | -          | -          | -          | -          | -          | -          | -          | 1           | 1          | -            |
| RA                  | 1          | -          | -          | -          | -          | -          | -          | -          | -          | -           | 1          | -            |
| UL                  | -          | -          | -          | -          | -          | -          | -          | -          | 1          | 1           | -          | -            |
| CAR                 | -          | -          | 1          | -          | -          | -          | -          | -          | -          | -           | -          | -            |
| MTC                 | -          | -          | 2          | 2          | -          | -          | -          | -          | -          | -           | -          | -            |
| <b>Back limb</b>    |            |            |            |            |            |            |            |            |            |             |            |              |
| PEL                 | 1          | -          | -          | 1          | -          | -          | -          | -          | -          | -           | -          | -            |
| FE                  | 1          | -          | -          | -          | -          | -          | -          | -          | -          | -           | -          | -            |
| PAT                 | -          | -          | -          | -          | -          | -          | -          | -          | -          | -           | -          | -            |
| TI                  | 2          | -          | -          | -          | -          | -          | -          | -          | -          | 2           | 1          | -            |
| AST                 | -          | -          | -          | -          | -          | -          | -          | -          | 1          | -           | -          | -            |
| CAL                 | 1          | -          | -          | -          | -          | -          | -          | -          | -          | 1           | -          | -            |
| TAR                 | -          | -          | -          | -          | -          | -          | -          | -          | -          | -           | -          | -            |
| MTT                 | -          | -          | -          | -          | -          | -          | -          | -          | -          | 2           | -          | -            |
| <b>Feet</b>         |            |            |            |            |            |            |            |            |            |             |            |              |
| PH1                 | 1          | 1          | -          | -          | -          | -          | -          | -          | -          | -           | -          | -            |
| PH2                 | -          | 1          | -          | -          | -          | -          | -          | -          | -          | -           | -          | -            |
| PH3                 | -          | 1          | -          | -          | -          | -          | -          | -          | -          | -           | -          | -            |
| SES                 | -          | -          | -          | -          | -          | -          | -          | -          | -          | -           | -          | -            |
| MTP                 | -          | -          | -          | -          | -          | -          | -          | -          | -          | 1           | -          | -            |
| LBF                 | -          | -          | -          | -          | -          | -          | -          | -          | -          | 40          | 7          | -            |
| <b>unidentified</b> |            |            |            |            |            |            |            |            |            |             |            | 67           |
| <b>NR</b>           | <b>12</b>  | <b>3</b>   | <b>7</b>   | <b>10</b>  | <b>2</b>   | <b>3</b>   | <b>1</b>   | <b>1</b>   | <b>2</b>   | <b>87</b>   | <b>12</b>  | <b>67</b>    |
| <b>%</b>            | <b>5.8</b> | <b>1.4</b> | <b>3.4</b> | <b>4.8</b> | <b>1.0</b> | <b>1.4</b> | <b>0.5</b> | <b>0.5</b> | <b>1.0</b> | <b>42.0</b> | <b>5.8</b> | <b>32.4</b>  |

**Table S-3.** Osteometrical data of Tell Humeida faunal remains.

In mm. Measures according Davis, 1996; von den Driesch, 1976; Levine, 1982. TAL, talus. MTC, metacarpal; PH1, first phalanx; PH2, second phalanx; PH3, third phalanx; LM, lower molar; UM, upper molar.

GL, greatest length. BP, proximal breadth; DP, proximal depth; BD, distal breadth; BFd: width of the distal articulation measured in the medio-lateral axis; WCM: medio-lateral width of the medial condyle; WCL: medio-lateral width of the lateral condyle; DEM: antero-posterior diameter of the external trochlea of the medial condyle; DVM: antero-posterior diameter of the verticillus of the medial condyle; DIM: antero-posterior diameter of the internal trochlea of the medial condyle; DIL: antero-posterior diameter of the internal trochlea of the lateral condyle; DVL: antero-posterior diameter of the verticillus of the lateral condyle; DEL: antero-posterior diameter of the external trochlea of the lateral condyle.

| TAXA              | BONE             | GL   |       |      |      |      |      |      |      |      |      |      |      |
|-------------------|------------------|------|-------|------|------|------|------|------|------|------|------|------|------|
| Felid             | TAL              | 28.3 |       |      |      |      |      |      |      |      |      |      |      |
| TAXA              | BONE             | BP   | DP    | BD   | BFd  | WCM  | WCL  | Dem  | Dvm  | Dim  | Dil  | Dvl  | Del  |
| <i>Ovis/Capra</i> | MTC              | 26.2 | -     | -    | -    | -    | -    | -    | -    | -    | -    | -    | -    |
| <i>Ovis aries</i> | MTC              | -    | -     | 29.9 | 28.0 | 12.9 | 12.7 | 14.6 | 20.5 | 17.7 | 17.8 | 19.6 | 13.1 |
| <i>Ovis aries</i> | MTC <sup>1</sup> | 28.8 | 21.2  | -    | -    | -    | -    | -    | -    | -    | -    | -    | -    |
| TAXA              | BONE             | GL   | BP    | SD   | BD   |      |      |      |      |      |      |      |      |
| <i>Equus</i> sp.  | PH1              | -    | -     | 19.0 | 30.5 |      |      |      |      |      |      |      |      |
| <i>Bos taurus</i> | PH1              | -    | 30.6  | 26.8 | 28.3 |      |      |      |      |      |      |      |      |
| <i>Bos taurus</i> | PH2              | 39.3 | 30.2  | 25.3 | 26.5 |      |      |      |      |      |      |      |      |
| TAXA              | BONE             | DLS  | MBS   | Ld   |      |      |      |      |      |      |      |      |      |
| <i>Bos taurus</i> | PH3              | 70.6 | 24.7  | 55.2 |      |      |      |      |      |      |      |      |      |
| TAXA              | Teeth            | H    | M-D D |      |      |      |      |      |      |      |      |      |      |
| <i>Equus</i> sp.  | LM <sup>2</sup>  | 55.9 | 22.6  |      |      |      |      |      |      |      |      |      |      |
| <i>Equus</i> sp.  | LM <sup>2</sup>  | 55.1 | 24.2  |      |      |      |      |      |      |      |      |      |      |
| <i>Equus</i> sp.  | UM               | -    | 18.7  |      |      |      |      |      |      |      |      |      |      |
| <i>Equus</i> sp.  | LM               | -    | 24.3  |      |      |      |      |      |      |      |      |      |      |

<sup>1</sup> large specimen

<sup>2</sup> same individual

Davis, S.J.M. 1996. Measurements of a group of adult female Shetland sheep skeletons from a single flock: a baseline for zooarchaeologists. *Journal of Archaeological Science* 23, 593-612.

Driesch v.d., A. 1976. *A guide to the measurement of animal bones from archaeological sites*. Peabody Mus. Bull. 1. Harvard.

Levine, M. 1982. The use of crown height measurements and eruption wear sequences to age horse teeth. En B. Wilson; C. Grigson y S. Payne (eds.): *Ageing and sexing animal bones from archaeological sites*, pp. 223-250. BAR British Series; 109. Oxford: BAR.

**Table S-4.** Peptide markers in bone collagen and taxonomic identification by ZooMS. Peptide markers following Welker *et al.* (2016).

| Species             | P1     | A      | A'     | B      | C      | P2     | D      | E      | F      | F'     | G      | G'     | Identification    |
|---------------------|--------|--------|--------|--------|--------|--------|--------|--------|--------|--------|--------|--------|-------------------|
| <i>Equus sp</i>     | 1105.6 | 1182.6 | 1198.6 | 1427.7 | 1550.8 | 1649.8 | 2145.1 | 2820.4 | 2883.4 | 2899.4 | 2983.5 | 2999.5 |                   |
| Sample:             |        |        |        |        |        |        |        |        |        |        |        |        |                   |
| TH09-H3             | +      |        |        | +      | +      | +      | +      |        |        |        | +      | +      | <i>Equus sp.</i>  |
| TH09-H4b            | +      | +      |        | +      | +      | +      | +      | +      |        |        |        | +      | <i>Equus sp.</i>  |
| TH09-H5             | +      |        |        | +      |        | +      | +      |        |        |        |        | +      | <i>Equus sp.</i>  |
| TH09-H6             | +      | +      |        | +      | +      | +      | +      | +      |        |        |        | +      | <i>Equus sp.</i>  |
| TH09-H9             | +      |        |        | +      | +      | +      | +      | +      |        |        |        | +      | <i>Equus sp.</i>  |
| TH09-H12            | +      | +      |        | +      | +      | +      | +      |        |        |        |        | +      | <i>Equus sp.</i>  |
| TH09-H14            | +      | +      |        | +      | +      | +      | +      |        |        |        |        | +      | <i>Equus sp.</i>  |
| TH09-H15            | +      |        |        | +      | +      | +      | +      | +      |        |        |        | +      | <i>Equus sp.</i>  |
| TH09-H18            | +      |        |        | +      | +      | +      | +      |        |        |        |        | +      | <i>Equus sp.</i>  |
| TH09-H19            | +      |        |        | +      |        |        | +      | +      |        |        |        | +      | <i>Equus sp.</i>  |
| Species             | P1     | A      | A'     | B      | C      | P2     | D      | E      | F      | F'     | G      | G'     | Identification    |
| <i>Ovis aries</i>   | 1105.6 | 1180.6 | 1196.6 | 1427.7 | 1580.8 | 1648.8 | 2131.1 | 2792.3 | 2883.4 | 2899.4 | 3017.5 | 3033.5 | <i>Ovis sp.</i>   |
| <i>Capra hircus</i> | 1105.6 | 1180.6 | 1196.6 | 1427.7 | 1580.8 | 1648.8 | 2131.1 | 2792.3 | 2883.4 | 2899.4 | 3077.5 | 3093.5 | <i>Ovis sp.</i>   |
| Sample:             |        |        |        |        |        |        |        |        |        |        |        |        |                   |
| TH09-H1             | +      |        | +      | +      | +      | +      | +      |        |        |        |        | 3033.5 | <i>Ovis sp.</i>   |
| TH09-H8             | +      |        |        | +      | +      | +      | +      |        |        |        |        | 3033.5 | <i>Ovis sp.</i>   |
| TH09-H17            | +      |        | +      | +      | +      | +      | +      | +      |        |        |        | 3033.5 | <i>Ovis sp.</i>   |
| TH09-H20            | +      | +      | +      | +      | +      | +      | +      |        |        |        |        | 3033.5 | <i>Ovis sp.</i>   |
| TH11-1              | +      |        | +      | +      | +      | +      | +      |        |        |        |        | 3033.5 | <i>Ovis sp.</i>   |
| TH11-2              | +      |        | +      | +      | +      | +      | +      | +      |        |        |        | 3033.5 | <i>Ovis sp.</i>   |
| TH11-3              | +      |        |        | +      | +      | +      | +      |        |        |        |        |        | <i>Ovis/Capra</i> |
| TH11-4              | +      |        | +      | +      | +      | +      | +      |        |        |        |        |        | <i>Ovis/Capra</i> |
| TH11-6              | +      |        | +      | +      | +      | +      | +      |        |        |        |        | 3093.5 | <i>Capra sp.</i>  |
| TH11-7              | +      | +      | +      | +      | +      | +      | +      |        |        |        |        | 3033.5 | <i>Ovis sp.</i>   |
| TH11-14             | +      | +      | +      | +      | +      | +      | +      |        |        |        | 3017.5 | 3033.5 | <i>Ovis sp.</i>   |
| TH11-16             | +      |        | +      | +      | +      | +      | +      |        |        |        | 3017.5 | 3033.5 | <i>Ovis sp.</i>   |
| TH11-23             | +      | +      | +      | +      | +      | +      | +      |        |        |        |        |        | <i>Ovis/Capra</i> |
| TH11-24             | +      | +      | +      | +      | +      | +      | +      |        |        |        | 3017.5 | 3033.5 | <i>Ovis sp.</i>   |
| TH11-20             | +      |        | +      | +      | +      | +      | +      |        |        |        | 3017.5 | 3033.5 | <i>Ovis sp.</i>   |

|                    | P1     | A      | A'     | B      | C      | P2     | D      | E      | F      | F'     | G      | G'     |
|--------------------|--------|--------|--------|--------|--------|--------|--------|--------|--------|--------|--------|--------|
| <i>Cervus</i>      | 1105.6 | 1180.6 | 1196.6 | 1427.7 | 1550.8 | 1648.8 | 2131.1 | 2792.3 | 2883.4 | 2899.4 | 3017.5 | 3033.5 |
| <i>Dama...</i>     | (?)    | 1180.6 | 1196.6 | 1427.7 | 1550.8 | (?)    | 2131.1 | (?)    | (?)    | (?)    | 3017.5 | 3033.5 |
| <i>Gazella</i> sp. | (?)    | 1180.6 | 1196.6 | 1427.7 | 1550.8 | (?)    | 2131.1 | (?)    | (?)    | (?)    | 3017.5 | 3033.5 |

Sample:

| Sample   | P1 | A | A' | B | C | P2 | D | E | F | F' | G | G' | Species        |
|----------|----|---|----|---|---|----|---|---|---|----|---|----|----------------|
| TH09-H7  | +  |   | +  | + | + | +  | + |   |   |    |   | +  | Cervid/Gazella |
| TH09-H4b | +  |   |    | + | + | +  | + | + | + |    |   | +  | Cervid/Gazella |
| TH11-11  | +  |   | +  | + | + | +  | + |   |   |    |   | +  | Cervid/Gazella |
| TH11-19  | +  |   | +  | + | + | +  | + | + |   |    | + | +  | Cervid/Gazella |
| TH11-21  | +  |   | +  | + | + | +  | + |   |   |    |   | +  | Cervid/Gazella |
| TH11-5   | +  |   |    | + |   | +  | + |   |   |    |   |    | (ruminant?)    |

| Species                | P1     | A      | A'     | B      | C      | P2     | D      | E      | F      | F'     | G      | G'     |
|------------------------|--------|--------|--------|--------|--------|--------|--------|--------|--------|--------|--------|--------|
| <i>Panthera tigris</i> | 1105.6 | 1207.6 | 1223.6 | 1453.7 | 1566.8 | 1609.8 | 2147.1 | 2820.4 | 2853.4 | 2869.4 | 2983.5 | 2999.5 |
| <i>Panthera leo</i>    | 1105.6 | 1207.6 | 1223.6 | 1453.7 | 1566.8 | (?)    | 2147.1 | 2820.4 | 2853.4 | 2869.4 | 2983.5 | 2999.5 |
| <i>Felis catus</i>     | 1105.6 | 1207.6 | 1223.6 | 1453.7 | 1566.8 | 1609.8 | 2163.1 | 2820.4 | 2853.4 | 2869.4 | 2983.5 | 2999.5 |
| <i>Lynx lynx</i>       | 1105.6 | 1207.6 | 1223.6 | 1453.7 | 1566.8 | 1609.8 | 2163.1 | 2820.4 | 2853.4 | 2869.4 | 2983.5 | 2999.5 |

Sample:

| Sample  | P1 | A | A' | B | C | P2 | D      | E | F | F' | G | G' | Species             |
|---------|----|---|----|---|---|----|--------|---|---|----|---|----|---------------------|
| TH11-8  | +  | + |    | + | + |    | 2147.1 |   |   |    |   | +  | <i>Panthera</i> sp. |
| TH11-25 | +  | + |    | + | + |    | 2163.1 | + |   |    |   | +  | <i>Felis/Lynx</i>   |

| Species              | P1     | A      | A'     | B      | C      | P2     | D      | E      | F      | F'     | G      | G'     |
|----------------------|--------|--------|--------|--------|--------|--------|--------|--------|--------|--------|--------|--------|
| <i>Vulpes vulpes</i> | 1105.6 | 1210.7 | 1226.7 | 1437.7 | 1566.8 | 1609.8 | 2131.1 | 2820.4 | 2853.4 | 2869.4 | 2983.5 | 2999.5 |
| <i>Canis lupus</i>   | 1105.6 | 1210.7 | 1226.7 | 1453.7 | 1566.8 | 1649.8 | 2131.1 | 2820.4 | 2853.4 | 2869.4 | 2983.5 | 2999.5 |

Sample:

| Sample   | P1 | A | A' | B      | C | P2 | D | E | F | F' | G | G' | Species              |
|----------|----|---|----|--------|---|----|---|---|---|----|---|----|----------------------|
| TH09-H2a | +  |   |    | 1437.7 |   |    | + | + |   |    |   | +  | <i>Vulpes vulpes</i> |

Welker, F., Hajdinjak, M., Talamo, S., Jaouen, K., Dannemann, M., David, F., Julien, M., Meyer, M., Kelso, J., Barnes, I., Brace, S., Kamminga, P., Fischer, R., Kessler, B.M., Stewart, J.R., Pääbo, S., Collins, M.J., Hublin, J.J. 2016. Palaeoproteomic evidence identifies archaic hominins associated with the Chatelperronian at the Grotte du Renne. *Proceedings of the National Academy of Sciences of the USA* 113, 11162–11167.  
<https://doi.org/10.1073/pnas.1605834113>

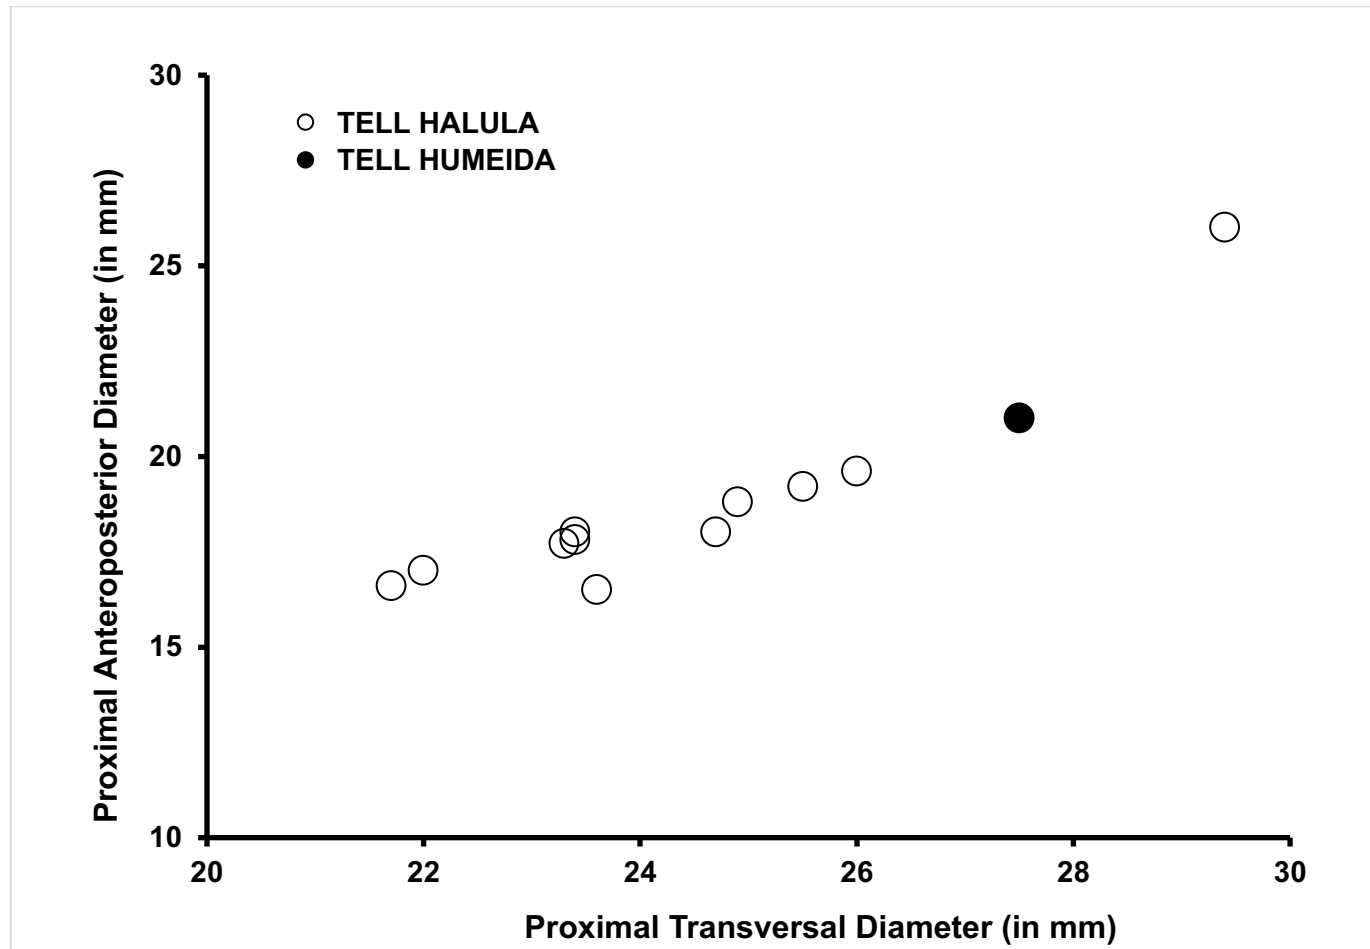

**Figure S-1.** Measurements of metacarpals (proximal end) from sheep at Tell Halula (Saña Seguí, 1999) and the specimen from Tell Humeida.

Saña Seguí, M. 1999. *Arqueología de la domesticación animal. La gestión de los recursos animales en Tell Halula (valle del Éufrates, Siria) del 8800 al 7000 BP*. Universitat Autònoma de Barcelona, 1999.

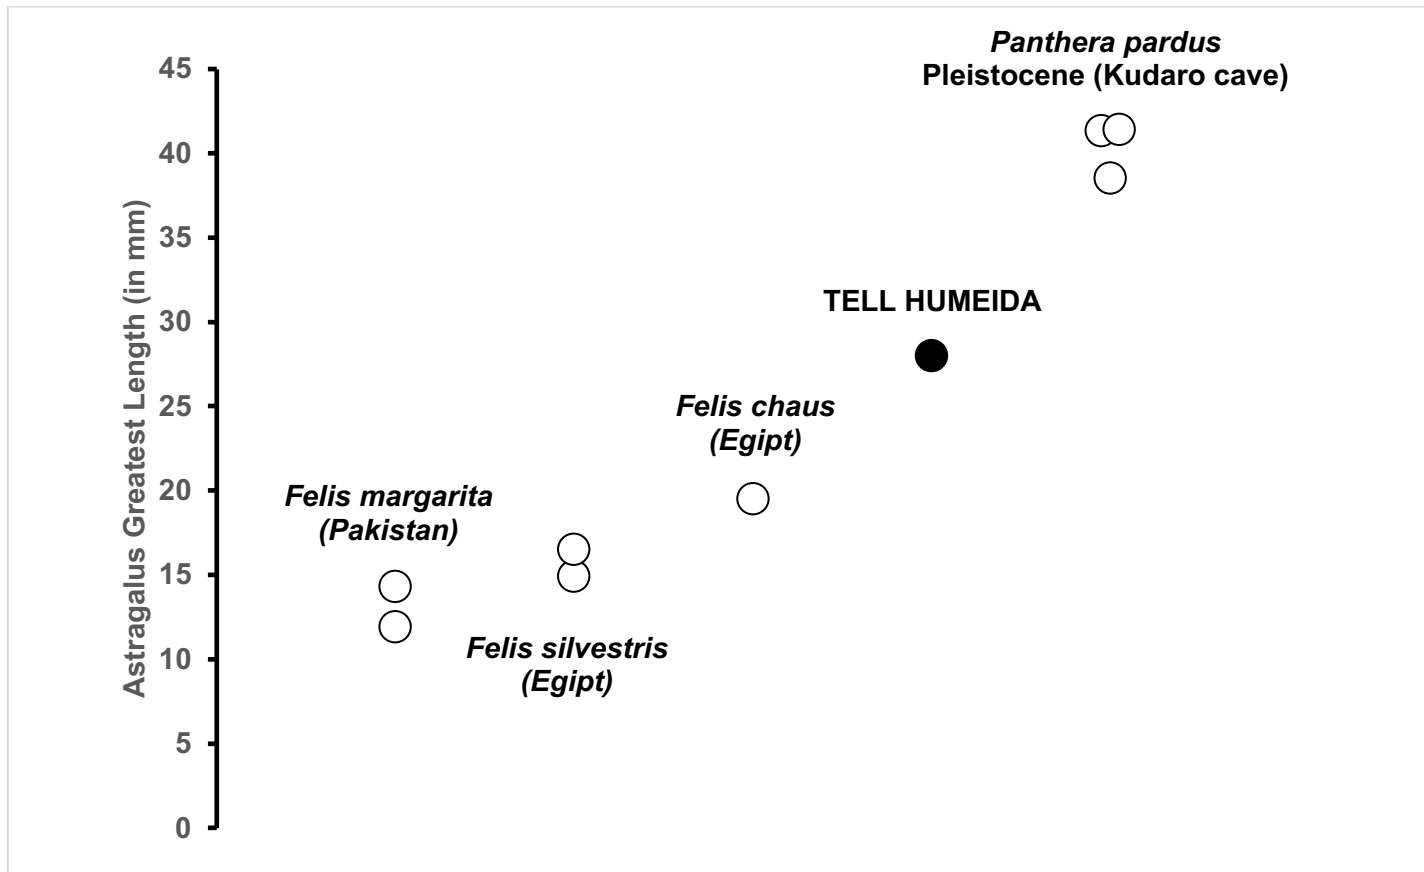

**Figure S-2.** Greatest length of felid astragalus from Egiptian Predynastic tombs (*Felis silvestris*, *Felis chaus*), *Felis margarita* (from Pakistan) (all of them according Van Neer et al, 2014), Pleistocene leopards from Kudaro cave in the Caucasus (Baryshnikov, 2011) and the specimen from Tell Humeida.

Baryshnikov, G. 2011. Pleistocene Felidae (Mammalia, Carnivora) from the Kudaro Paleolithic cave sites in the Caucasus. *Proceedings of the Zoological Institute RAS* 315 (3), 197–226.

Van Neer, W., Linseele, V., Friedman, R., De Cupere, B. 2014. More evidence for cat taming at the Predynastic elite cemetery of Hierakonpolis (Upper Egypt), *Journal of Archaeological Science* 45, 103-111. <https://doi.org/10.1016/j.jas.2014.02.014>

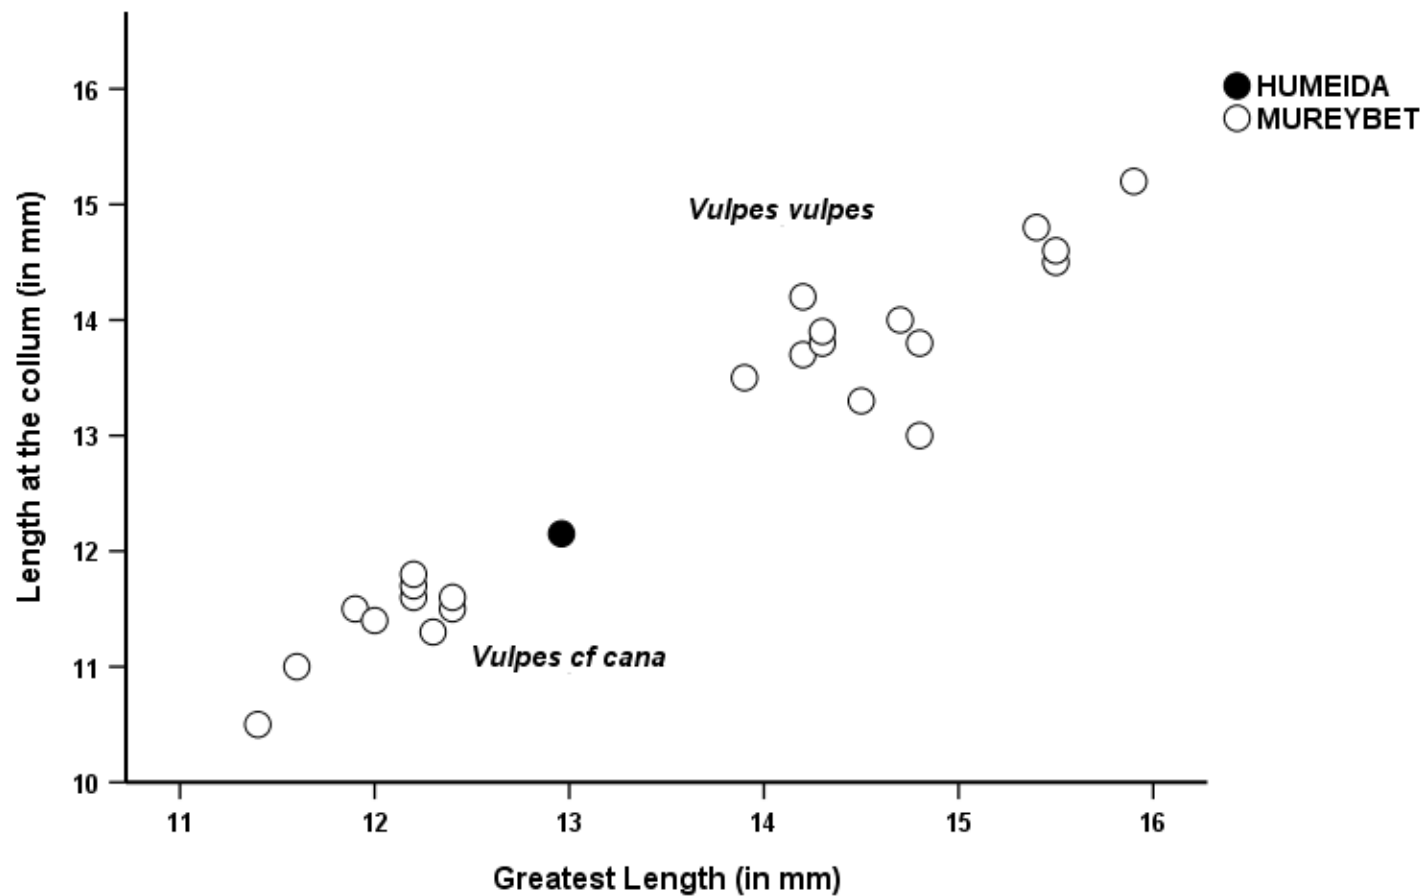

**Figure S-3.** Measurements of the lower carnassial (m1) from foxes recovered at Tell Mureybet (Gourichon and Helmer 2008, supplement data) and the specimen from Tell Humeida.

Gourichon, L., Helmer, D. 2008. Etude archéozoologique de Mureybet. In Ibáñez, Juan José, - Tell Mureybet, un site néolithique dans le Moyen Euphrate syrien. Lyon, Oxford: Archeopress, Maison de l'Orient et de la Méditerranée/BAR intern. series 1843, pp. 115-227.



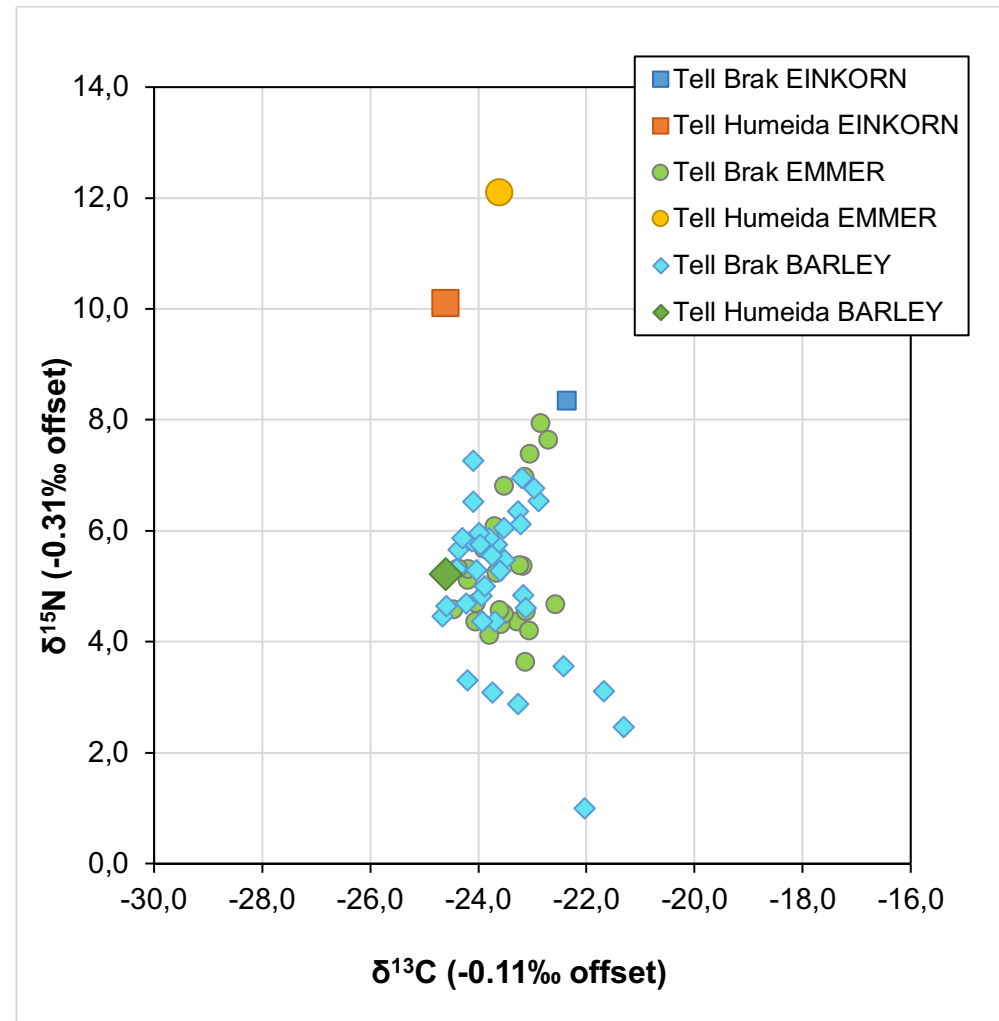

**Figure S-4.**  $\delta^{13}\text{C}$  and  $\delta^{15}\text{N}$  of wheats and barley from Tell Humeida compared with those from Tell Brak of the same chronology (Styring *et al.*, 2017).

Styring, A., Charles, M., Fantone, F., Hald, M.M., McMahon, A., Meadow, R.H., Nicholls, G.K., Patel, A.K., Pitre, M.C., Smith, A., Sołtysiak, A., Stein, G., Weber, J.A., Harvey Weiss, H., Bogaard, A. 2017. Isotope evidence for agricultural extensification reveals how the world's first cities were fed. *Nature Plants* 3, article 17076. <https://doi.org/10.1038/nplants.2017.76>
